# Supplementary material for: Safety and immunogenicity of a bivalent HPV16/18 vaccine in Chinese females
Source: PubMed Central journal article supplement — Hum Vaccin Immunother. 2023 May 30;19(1):2209001. doi: 10.1080/21645515.2023.2209001 (PMC10294733; doi:10.1080/21645515.2023.2209001), 2023-05-30
Supplement: KHVI_A_2209001_SM4066.pdf [file KHVI_A_2209001_SM4066.pdf]

## Supplementary appendix

Safety and immunogenicity of a bivalent HPV16/18 vaccine in Chinese females

Li-Wei Shi et al.

|                                                                                    |   |
|------------------------------------------------------------------------------------|---|
| <b>Table 1:</b> Local AE grading.....                                              | 2 |
| <b>Table 2:</b> Systemic AE grading.....                                           | 3 |
| <b>Table 3:</b> Causality assessment criteria .....                                | 4 |
| <b>Table 4:</b> Demographics of Safety Set.....                                    | 5 |
| <b>Table 5:</b> Baseline seropositivity rates of Safety Set.....                   | 5 |
| <b>Table 6:</b> Neutralizing response in initially seropositive participants ..... | 6 |
| <b>Table 7:</b> Adverse events and Grade 3 events after each vaccine dose.....     | 7 |
| <b>Table 8:</b> Details of withdrawals because of any adverse event .....          | 8 |
| <b>Table 9:</b> Overall pregnancy outcomes.....                                    | 9 |

**Supplementary Table 1.** Local Reaction Grading

| <b>Local reaction</b> | <b>Mild<br/>(grade 1)</b>           | <b>Moderate<br/>(grade 2)</b>                                    | <b>Severe<br/>(grade 3)</b>                                        | <b>Potentially life-threatening<br/>(grade 4)</b> |
|-----------------------|-------------------------------------|------------------------------------------------------------------|--------------------------------------------------------------------|---------------------------------------------------|
| Pain                  | Without affecting activities        | Affecting activities or using non-narcotic analgesics many times | Affecting daily activities or using narcotic analgesics many times | Requiring emergency treatment or hospitalization  |
| Induration *          | <15 mm                              | 15~30 mm                                                         | >30 mm                                                             | Gangrene or exfoliative dermatitis                |
| Redness *             | <15 mm                              | 15~30 mm                                                         | >30 mm                                                             | Gangrene or exfoliative dermatitis                |
| Swelling **           | <15 mm without affecting activities | 15 - 30 mm or affecting activities                               | > 30 mm or limiting daily activities                               | Gangrene                                          |
| Rash (injection site) | <15 mm                              | 15~30 mm                                                         | >30 mm                                                             | /                                                 |
| Itching               | Slightly itchy in injection site    | Moderately itchy in injection limb                               | Itchy all over                                                     | /                                                 |

Guidelines for Adverse Reaction Classification Standards for Clinical Trials of Preventive Vaccines. 2005  
Available from: [https://www.nmpa.gov.cn/xxgk/fgwj/gzwj/gzwjyp/20051014010101369\\_5.html](https://www.nmpa.gov.cn/xxgk/fgwj/gzwj/gzwjyp/20051014010101369_5.html)

**Supplementary Table 2.** Systemic reactions grading

| Systemic reactions / Vital signs               | Mild (grade 1)                                                                             | Moderate (grade 2)                                                                                      | Serious (grade 3)                                                                                                               | Potentially life-threatening (grade 4)                                                                |
|------------------------------------------------|--------------------------------------------------------------------------------------------|---------------------------------------------------------------------------------------------------------|---------------------------------------------------------------------------------------------------------------------------------|-------------------------------------------------------------------------------------------------------|
| Fever (axillary temperature)                   | 37.1–37.5°C                                                                                | 37.6–39.0°C                                                                                             | > 39.0°C                                                                                                                        |                                                                                                       |
| Allergic reaction                              | Itching without rash                                                                       | Local urticaria                                                                                         | Extensive urticaria, angioedema                                                                                                 | Severe allergic reaction                                                                              |
| Headache                                       | Without affecting activities requiring treatment                                           | Transient, slightly affecting activities, requiring treatment (multiple use of non-narcotic analgesics) | Seriously affecting daily activities, with initial anesthetic treatment response                                                | Refractory, requiring repeated anesthetic treatment. Requiring emergency treatment or hospitalization |
| Fatigue, tiredness                             | Normal activities weakened for < 48 hours, without affecting activities                    | 20–50% of normal activities weakened for > 48 hours, slightly affecting activities                      | More than 50% of normal activities weakened, seriously affecting daily activities, and causing out of work                      | Incapable of taking care of themselves, requiring emergency treatment or hospitalization              |
| Nausea, vomiting                               | 1–2 times / 24 hours, basically normal intake, without affecting activities                | 2–5 times / 24 hours, significantly decreased intake, or limited activities                             | > 6 times within 24 hours, no obvious intake, requiring intravenous infusion                                                    | Requiring hospitalization or other nutrition due to hypotensive shock                                 |
| Diarrhea                                       | Mild or transient, 2 - 3 loose stools / day, or mild diarrhea lasting for less than 1 week | Moderate or persistent, 4–5 times / day, or diarrhea > 1 week                                           | > 6 watery stools/day, or bloody diarrhea, orthostatic hypotension, electrolyte imbalance, requiring intravenous infusion > 2 L | Hypotensive shock, requiring hospitalization                                                          |
| Myalgia                                        | Without affecting daily activities                                                         | Muscle tenderness at non-injection site, slightly affecting daily activities                            | Severe muscle tenderness, seriously affecting daily activities                                                                  | Obvious symptoms, muscle necrosis, requiring emergency treatment or hospitalization                   |
| Other discomfort or clinical adverse reactions | Without affecting activities                                                               | Slightly affecting activities, requiring no medication                                                  | Seriously affecting daily activities, requiring medication                                                                      |                                                                                                       |

---

**Supplementary Table 3. Causality assessment criteria**

---

- Definitely unrelated: AEs occurred due to other factors, such as clinical condition of the subject, other treatments, or concomitant medication.
  - Possibly unrelated: AEs occurred possibly due to other factors, such as clinical condition of subjects, other treatments, or concomitant medications, which were inconsistent with the known information of study vaccine.
  - Possibly related: AEs were consistent with the known information of study vaccine and had a causal relationship with the study vaccine, but might also be related to other factors.
  - Probably related: AEs were consistent with the known information of study vaccine, and had a causal relationship with study vaccine, which could not be explained by other factors, such as clinical condition of the subject, other treatments, or concomitant medication.
  - Certainly related: AEs were consistent with the known information of study vaccine, and had a causal relationship with study vaccine, which could not be explained by other factors, such as clinical condition of the subject, other treatments, or concomitant medication. In addition, when the study vaccine was used again, AEs would occur repeatedly.
-

**Supplementary table 4.** Demographic characteristics of the participants included in the Safety Set <sup>a</sup>

| Characteristic              | All participants |         |
|-----------------------------|------------------|---------|
|                             | Placebo          | Vaccine |
| <b>N =</b>                  | 600              | 597     |
| <b>Age (y)</b> , median     | 17.8             | 18.0    |
| <b>Height (cm)</b> , median | 153              | 153     |
| <b>Weight (kg)</b> , median | 46.0             | 46.5    |
| <b>Ethnic group (n)</b>     |                  |         |
| Han                         | 489              | 496     |
| Zhuang                      | 47               | 37      |
| Yao                         | 63               | 59      |
| Other                       | 1                | 5       |

**Supplementary table 5.** Baseline seropositivity rates of the participants included in the Safety Set <sup>a</sup>

|                                               | HPV16    |          |               | HPV18    |          |          |
|-----------------------------------------------|----------|----------|---------------|----------|----------|----------|
|                                               | Placebo  | Vaccine  | <i>p</i>      | Placebo  | Vaccine  | <i>p</i> |
| <b>Baseline seropositivity rates (n, %)</b>   |          |          |               |          |          |          |
| All                                           | 11 (1.8) | 21 (3.5) | <b>0.071*</b> | 16 (2.7) | 22 (3.7) | 0.315    |
| 9–17 years                                    | 1 (0.3)  | 3 (1.0)  | 0.624         | 6 (2.0)  | 5 (1.7)  | 1.000    |
| 18–26 years                                   | 5 (4.2)  | 4 (3.3)  | 1.000         | 4 (3.3)  | 5 (4.2)  | 1.000    |
| 27–45 years                                   | 5 (2.8)  | 14 (7.9) | <b>0.031*</b> | 6 (3.3)  | 12 (6.8) | 0.137    |
| <b>Baseline neutralising GMTs<sup>b</sup></b> |          |          |               |          |          |          |
| All                                           | 20.6     | 21.2     | 0.137         | 20.8     | 21.1     | 0.295    |
| 9–17 years                                    | 20.1     | 20.5     | 0.225         | 20.6     | 20.7     | 0.738    |
| 18–26 years                                   | 21.2     | 21.4     | 0.828         | 21.0     | 21.1     | 0.875    |
| 27–45 years                                   | 21.1     | 22.2     | 0.229         | 21.0     | 21.9     | 0.235    |

\* indicates significant differences were observed between groups.

a. Safety Set included enrolled participants who received at least one dose of vaccine or placebo.

b. GMTs indicates geometric mean neutralisation titres.

**Supplementary table 6.** Month 7 neutralising antibody responses as geometric mean titres (GMTs) and seroconversion rates (SCR) in initially seropositive participants

| Antibody       | Population       | Placebo group |                        |                   | Vaccine group |                        |                     |  |  |
|----------------|------------------|---------------|------------------------|-------------------|---------------|------------------------|---------------------|--|--|
|                |                  | N             | Seroconverted<br>n (%) | GMT (95%CI),      | N             | Seroconverted<br>n (%) | GMT (95%CI),        |  |  |
| <b>Month 7</b> |                  |               |                        |                   |               |                        |                     |  |  |
| <b>HPV16</b>   | All participants | 8             | 1 (12.5)               | 95.1 (48.4, 187)  | 20            | 20 (100)               | 7241 (4604, 11386)  |  |  |
|                | 9–17 years       | 1             | 0                      | 20.0 (-, -)       | 3             | 3 (100)                | 25803 (716, 929700) |  |  |
|                | 18–26 years      | 3             | 0                      | 80.0 (14.3, 448)  | 3             | 3 (100)                | 5120 (915, 28646)   |  |  |
|                | 27–45 years      | 4             | 1 (25.0)               | 160 (160, 160)    | 14            | 14 (100)               | 5940 (3901, 9046)   |  |  |
| <b>HPV18</b>   | All participants | 14            | 0                      | 24.4 (17.5, 33.9) | 20            | 20 (100)               | 4017 (2095, 7704)   |  |  |
|                | 9–17 years       | 5             | 0                      | 20.0 (20.0, 20.0) | 5             | 5 (100)                | 11763 (1820, 76004) |  |  |
|                | 18–26 years      | 3             | 0                      | 20.0 (20.0, 20.0) | 4             | 4 (100)                | 5120 (2080, 12600)  |  |  |
|                | 27–45 years      | 6             | 0                      | 31.8 (13.2, 76.6) | 11            | 11 (100)               | 2557 (937, 5436)    |  |  |

**Supplementary table 7.** Participants reporting adverse events, serious adverse events and solicited local reactions and systemic adverse events after any dose of vaccine or placebo in the Safety Set<sup>a</sup>

|                                             | All participants |                 | 9–17 years cohort |                 | 18–26 years cohort |                | 27–45 years cohort |                |
|---------------------------------------------|------------------|-----------------|-------------------|-----------------|--------------------|----------------|--------------------|----------------|
|                                             | Placebo          | Vaccine         | Placebo           | Vaccine         | Placebo            | Vaccine        | Placebo            | Vaccine        |
| <b>N =</b>                                  | 600              | 599             | 300               | 300             | 120                | 120            | 180                | 179            |
| <b>Any adverse event, n (%)<sup>b</sup></b> |                  |                 |                   |                 |                    |                |                    |                |
| <b>Any</b>                                  | 435 (72.5)       | 418 (69.8)      | 241 (80.3)        | 227 (75.7)      | 94 (78.3)          | 91 (75.8)      | 100 (55.6)         | 100 (55.9)     |
| <b>Grade 3</b>                              | <b>17 (2.8)</b>  | <b>19 (3.2)</b> | <b>10 (3.3)</b>   | <b>12 (4.0)</b> | <b>5 (4.2)</b>     | <b>3 (2.5)</b> | <b>2 (1.1)</b>     | <b>4 (2.2)</b> |
| Dose 1                                      | 323 (53.8)       | 289 (48.3)      | 183 (61.0)        | 165 (55.0)      | 72 (60.0)          | 59 (49.2)      | 68 (37.8)          | 65 (36.3)      |
| <b>Grade 3</b>                              | <b>3 (0.5)</b>   | <b>8 (1.3)</b>  | <b>1 (0.3)</b>    | <b>5 (1.7)</b>  | <b>2 (1.7)</b>     | <b>2 (1.7)</b> | <b>0</b>           | <b>1 (0.6)</b> |
| Dose 2                                      | 248 (43.0)       | 239 (41.3)      | 152 (51.7)        | 135 (46.6)      | 47 (42.3)          | 58 (51.8)      | 49 (28.5)          | 46 (26.0)      |
| <b>Grade 3</b>                              | <b>10 (1.7)</b>  | <b>5 (0.9)</b>  | <b>8 (2.7)</b>    | <b>2 (0.7)</b>  | <b>1 (0.9)</b>     | <b>1 (0.9)</b> | <b>1 (0.6)</b>     | <b>2 (1.1)</b> |
| Dose 3                                      | 162 (28.9)       | 168 (30.0)      | 95 (33.0)         | 112 (39.2)      | 36 (35.0)          | 33 (31.7)      | 31 (18.2)          | 23 (13.5)      |
| <b>Grade 3</b>                              | <b>1 (0.2)</b>   | <b>5 (0.9)</b>  | <b>0</b>          | <b>5 (1.8)</b>  | <b>0</b>           | <b>0</b>       | <b>1 (0.6)</b>     | <b>0</b>       |

a. Safety Set includes all participants who received at least one dose of vaccine or placebo.

b. Includes solicited local reactions and systemic adverse events and unsolicited adverse events.

**Supplementary table 8.** Details of withdrawals because of any adverse event

| Vaccine group          |           |                            |      |                             | Placebo group          |           |                          |      |                             |
|------------------------|-----------|----------------------------|------|-----------------------------|------------------------|-----------|--------------------------|------|-----------------------------|
| Reasons for withdrawal |           |                            |      |                             | Reasons for withdrawal |           |                          |      |                             |
| Case no.               | Age (yrs) | Type of event              | Dose | Time post vaccination (day) | Case no.               | Age (yrs) | Type of event            | Dose | Time post vaccination (day) |
| 1                      | 45.4      | Uterine cervix hyperplasia | 1    | 56                          | 1                      | 15.3      | Pyrexia                  | 1    | 6                           |
|                        |           |                            |      |                             | 2                      | 35.7      | Heavy menstrual bleeding | 1    | 24                          |

From study start up to Month 12, in total, 3 subjects prematurely discontinued the study due to an AE/SAE:

Participant #1 in the vaccine group prematurely discontinued the study due to the SAE of cervical intraepithelial neoplasia III (CIN III). The participant was hospitalized for pan hysterectomy 56 days after the first dose of vaccine. This SAE was considered by the investigator as not related to study vaccine.

Participant #1 in the Placebo group prematurely discontinued the study due to an AE of pyrexia (38.8°C) that started 6 days after the first dose.

Participant #2 in the Placebo group prematurely discontinued the study due to an AE of heavy menstrual bleeding started 24 days after the first dose.



---

**Supplementary table 9.** Overall pregnancy outcomes

---

|                                         | <b>Placebo group</b> | <b>Vaccine group</b> |
|-----------------------------------------|----------------------|----------------------|
| <b>Pregnancies</b> (events reported, n) | 9                    | 15                   |
| <b>Live birth</b>                       |                      |                      |
| - Normal delivery (n, %)                | 5 (56)               | 8 (53)               |
| <b>Abortion</b>                         |                      |                      |
| - Elective abortion (n, %)              | 3 (33)               | 7 (47)               |
| - Spontaneous abortion (n, %)           | 1*(11)               | 0                    |

---

n: Number of subjects report at least one specified event;

\* One case of spontaneous abortion occurred in the placebo group due to premature rupture of membranes.
